# Supplementary material
Source: PubMed Central journal article supplement (PMC6581193)

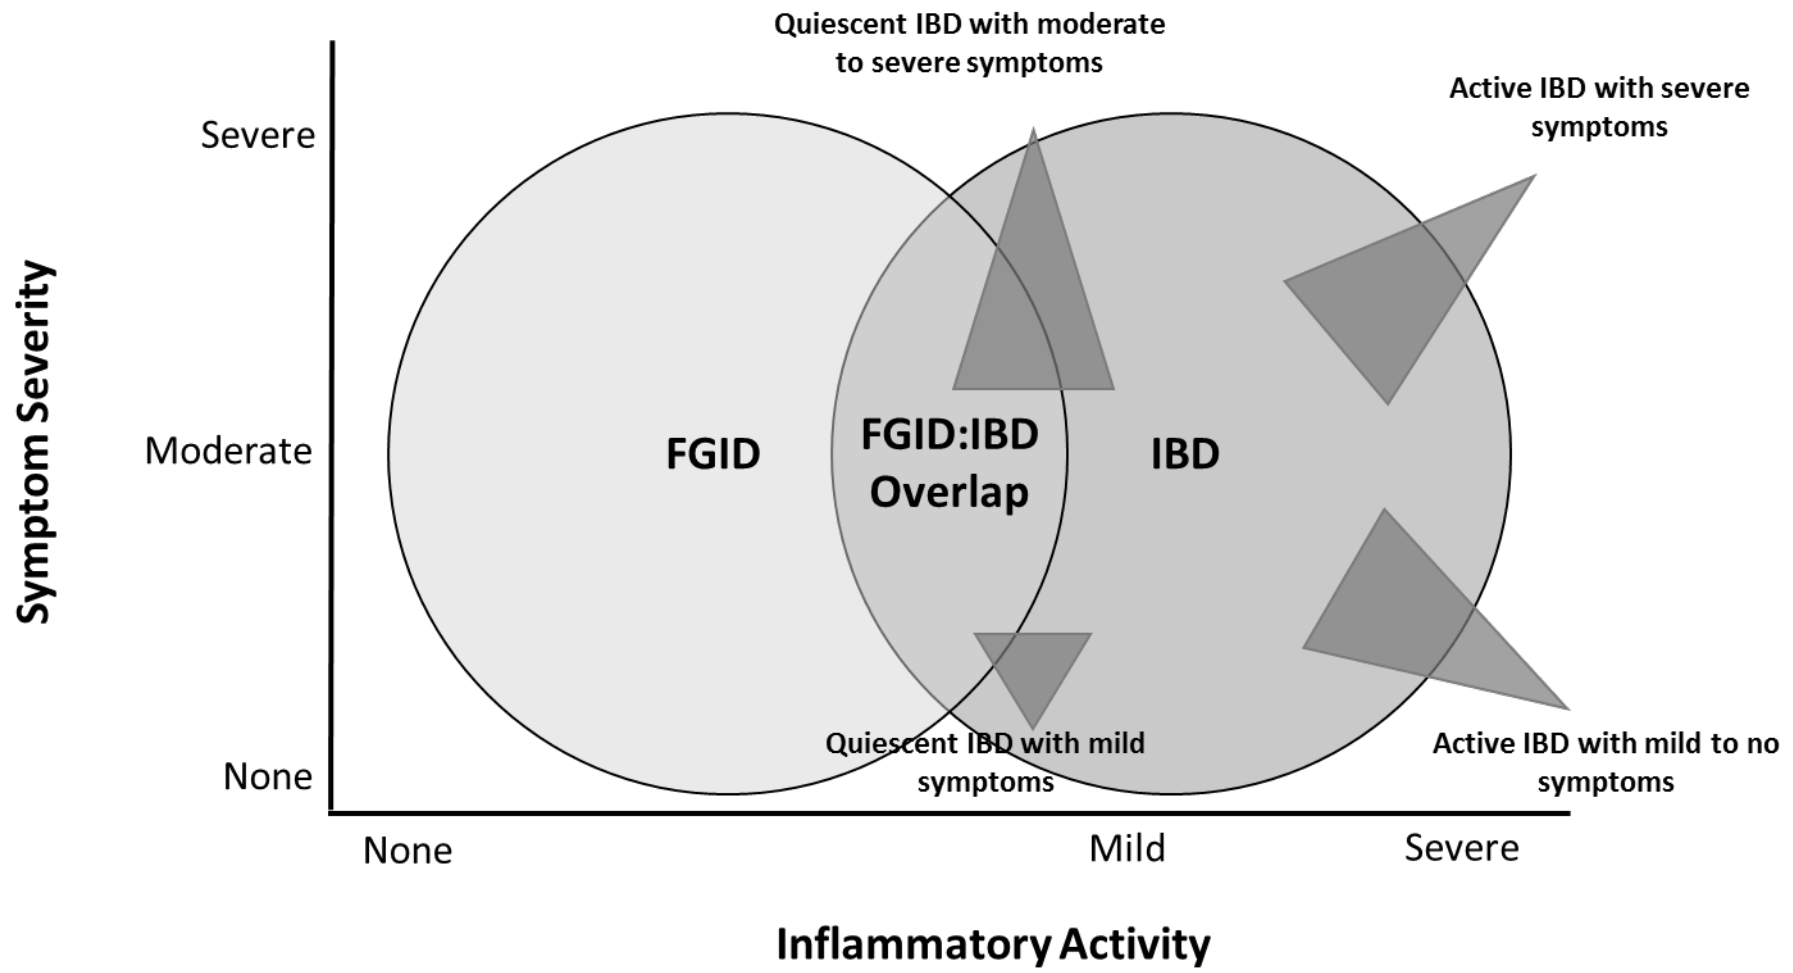

Supplement: NIHMS1503309-supplement-1.pdf [file NIHMS1503309-supplement-1.pdf]
